# Supplementary material
Source: PubMed Central journal article supplement (PMC4769123)
Supplement: NIHMS706032-supplement-01.pdf [file NIHMS706032-supplement-01.pdf]

**Supplemental Figure 1.** Funnel plots of the included studies showing the lack of publication bias and the consistency of the study results around the overall odds ratio estimate. The plots were constructed for each outcome separately.
